# Supplementary material for: The fabrication of oriented ZnO porous nanoplates on the silver foil with tunable hydrophobicity
Source: Royal Society of Chemistry journal article supplement (doi:10.1039/c3ce42262c), 2013-11-20
Supplement: c3ce42262c.pdf [file c3ce42262c.pdf]

**The fabrication of oriented ZnO porous nanoplates on the silver foil  
with tunable hydrophobicity**

Yunlong Zhang, Heng Yang, Guan Zhang, Jingcheng Cui and Jinhua  
Zhan\*

Key Laboratory of Colloid and Interface Chemistry, Ministry of Education, Department  
of Chemistry, Shandong University, Jinan, 250100, Shandong (P. R. China)

\* Corresponding author: E-mail: [jhzhan@sdu.edu.cn](mailto:jhzhan@sdu.edu.cn)

Fax: +86-0531-8836-6280

### Supporting Information

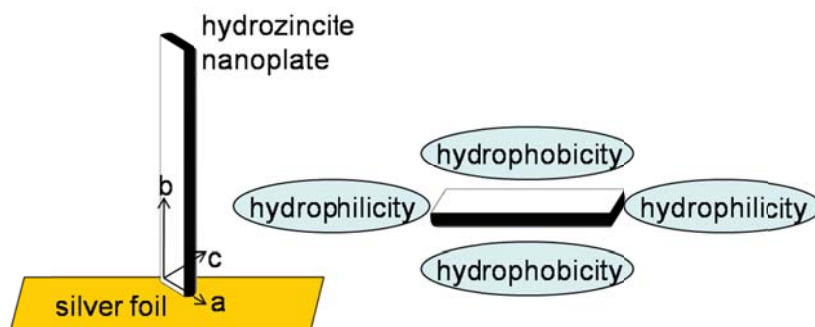

**Figure S-1** nucleation and the grow model of hydrozincite on the silver foil

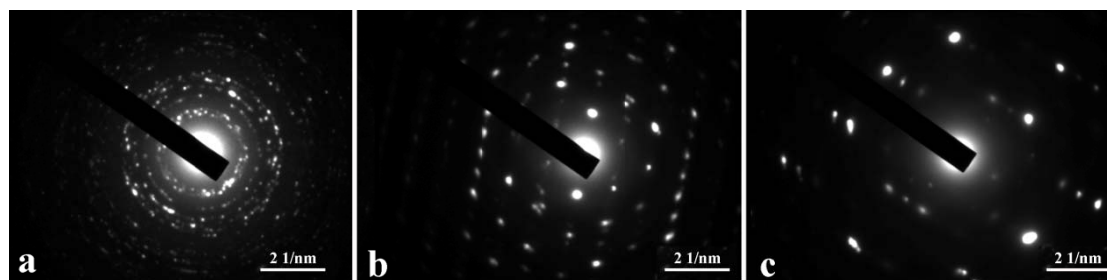

**Figure S-2** the Selected area electron diffraction (SAED) patterns of ZnO nanoplates after annealing at different temperature (a) 300 °C (b) 400 °C (c) 500 °C

Table 1 the contact angle for ZnO nanoplates modified with different fatty acids. (a) acetic acid, (b) butyric acid, (c)  $\alpha$ -hexanoic acid, (d) caprylic acid, (e) decanoic acid, (f) lauric acid, (g) myristic acid, and (h) stearic acid

| Fatty acids \ Soaking time | a   | b   | c    | d    | e    | f    | g    | h    |
|----------------------------|-----|-----|------|------|------|------|------|------|
| 0h                         | 21° | 21° | 21°  | 21°  | 21°  | 21°  | 21°  | 21°  |
| 2h                         | 12° | 20° | 97°  | 120° | 138° | 134° | 137° | 140° |
| 4h                         | 17° | 29° | 117° | 128° | 140° | 136° | 141° | 144° |
| 6h                         | 31° | 34° | 125° | 133° | 142° | 137° | 144° | 146° |
| 8h                         | 30° | 20° | 115° | 130° | 144° | 144° | 146° | 149° |
| 10h                        | 28° | 18° | 110° | 125° | 140° | 149° | 148° | 150° |
| 12h                        | 12° | 14° | 106° | 118° | 127° | 131° | 152° | 155° |

As shown in the table 1, the contact angle changed with the soaking time in the different fatty acids solution. The equilibrium time of acetic acid and butyric acid was about 6 hours, and the contact angle was 31 ° and 34 °. With the increased time, the contact angle decreased, for the ZnO surface was attacked with the strong acidity. With the carbon-chain of fatty acids longer, the acidity of fatty acids becomes weaker. The equilibrium time of butyric acid,  $\alpha$ -hexanoic acid, caprylic acid, decanoic acid, lauric acid was 6 h, 6 h, 8 h, 10 h respectively. When the soaking time of samples was over the equilibrium time, the contact angle decreased. It might be due to the formation of multilayer of fatty acids on the surface. When the carbon chain increased, the equilibrium time was about 12 h, and the contact angles were 152 ° and 155° respectively. With the soaking time, the fatty acids might form monolayer on the sample surface.

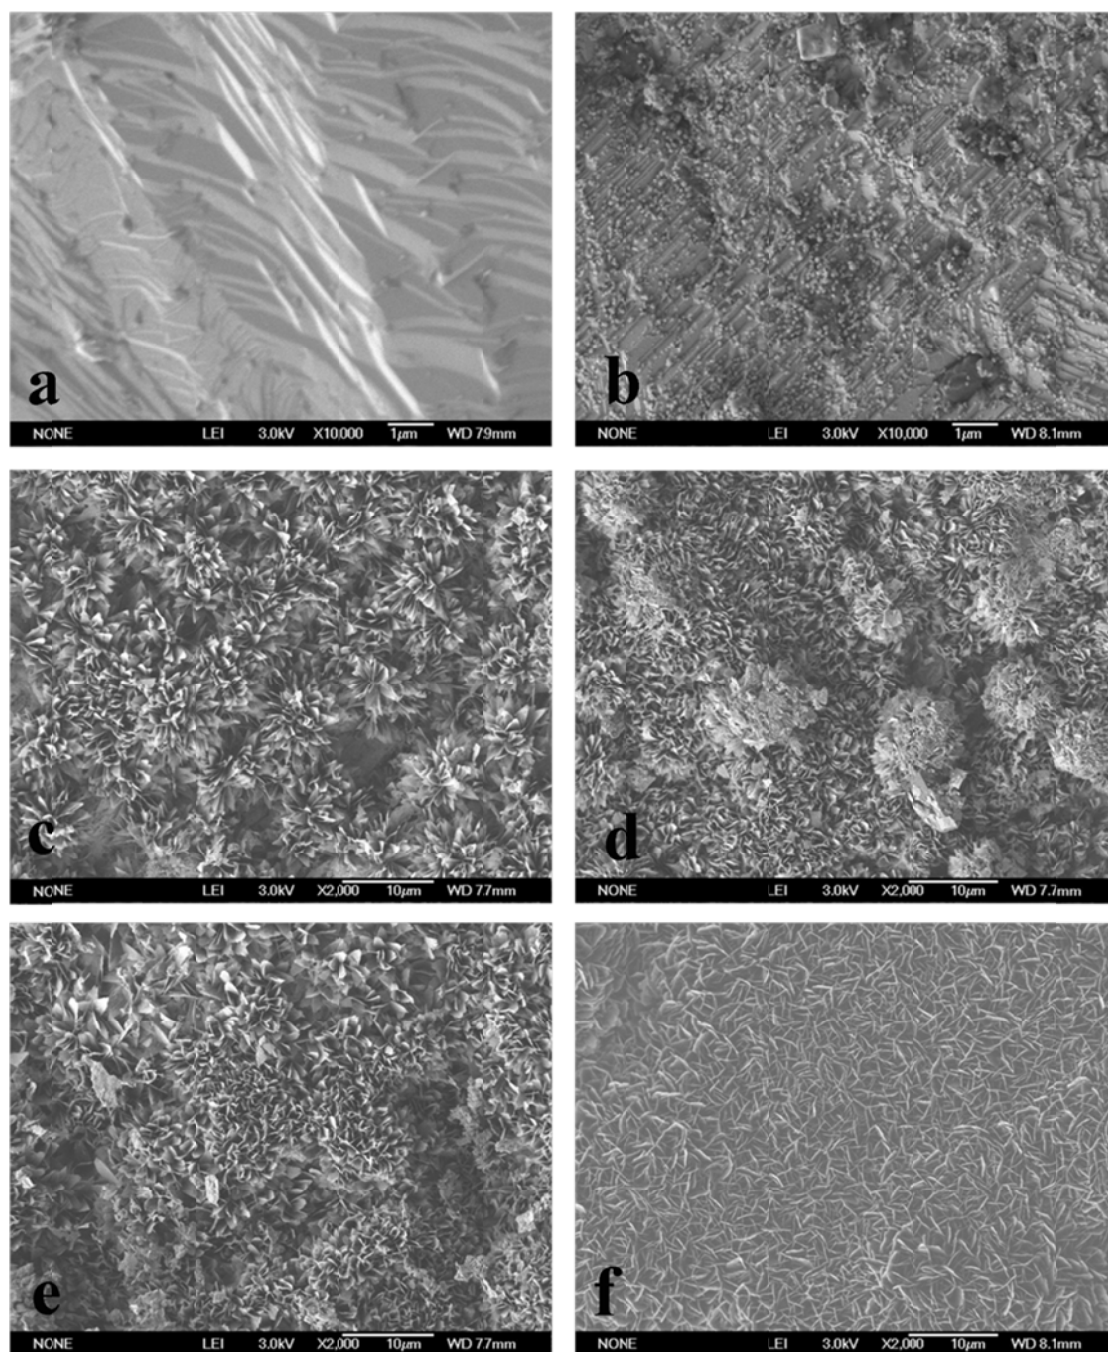

**Figure S-3** SEM images of hydrozincite on the silver foil (a) 0 h, (b) 1h, (c) 2h, (d) 3h, (e) 4 h, and (f) 6 h

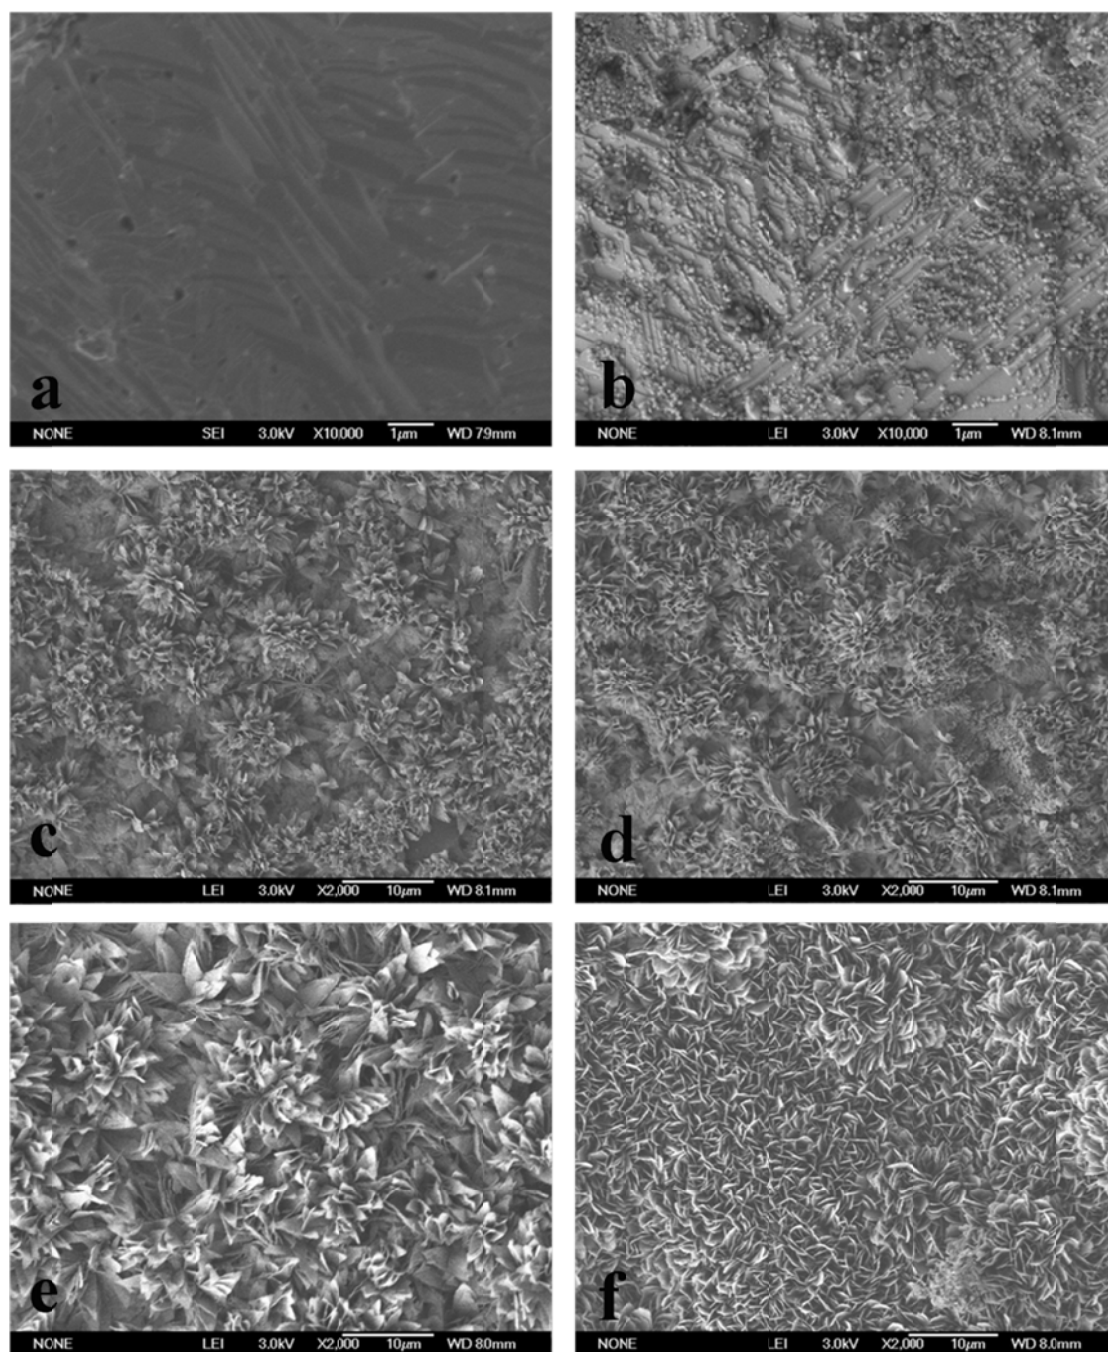

Figure S-4 SEM images of ZnO on the silver foil (a) 0 h, (b) 1 h, (c) 2 h, (d) 3 h, (e) 4 h, and (f) 6 h.

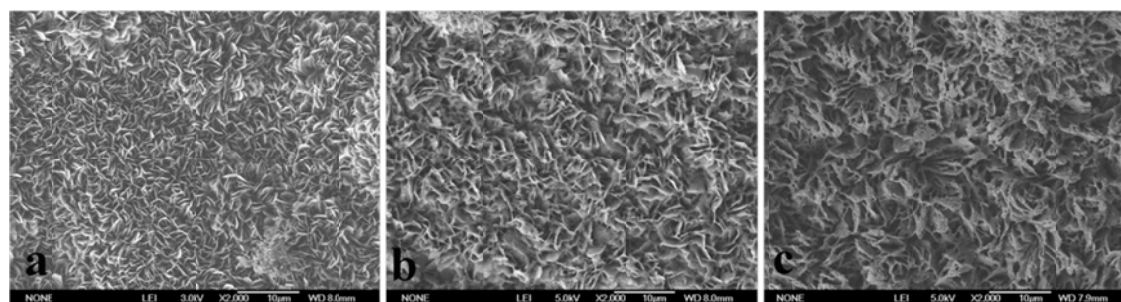

Figure S-5 SEM images of ZnO on the silver foil (a) 6 h, (b) after soaking in the stearic acids for 12 h, (c) after the UV irradiation of ZnO nanoplates with stearic acids for 6 h.

Table 2 the contact angle of samples with UV illumination

|                         | Bare silver | ZnO | ZnO with stearic acids |
|-------------------------|-------------|-----|------------------------|
| No UV illumination      | 64°         | 21° | 155°                   |
| UV illumination for 6 h | 64°         | 21° | 21°                    |

As shown the table, the contact angles of the samples changed with the increasing light illumination time. After light illumination for 6 h, the contact angle of bare silver foil was 64°, which was consistent with that of the silver foil without light illumination. The contact angle of bare ZnO surface was 21°. It was also similar to that of the stearic-acid-covered samples after UV irradiation for 6h. Comparing the results, it was indicated that the silver and ZnO materials had no effect on the change of contact angle after the light illumination, though they were the unique photo-responses.

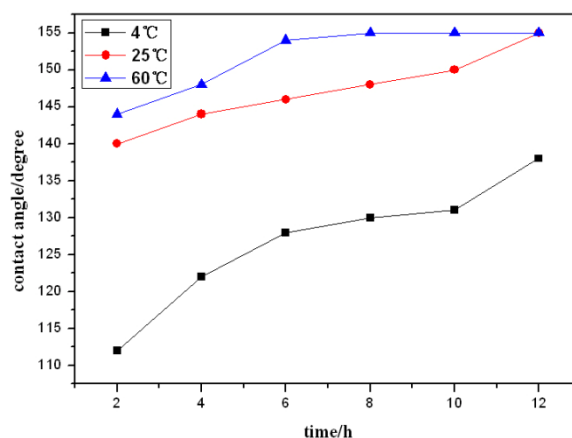

**Figure S-6** The equilibrium curve of contact angles for ZnO nanoplates with different soaking time at different temperature in stearic acid. The growth time of ZnO nanoplates is 6 h.

The assemble temperature of the samples in the stearic acids was shown in the figure S-6, when it was 60°C, the equilibrium time was 6h, and 12h was necessary when it was air temperature (25°C). But when the temperature was 4°C, the equilibrium time was far above 12h. At the different temperatures, the fatty acids molecules showed different dynamic character. When the temperature was low, the diffusion of fatty acids molecules in the solution occurred at a more slowly rate than the high temperature. The air temperature was chosen, taking into account the green chemistry.
